# Supplementary material
Source: PubMed Central journal article supplement (PMC3911443)
Supplement: JCM.01820-13_zjm999093096so1.pdf [file JCM.01820-13_zjm999093096so1.pdf]

1 **Supplementary Materials and Methods**

2 **Measurement of bacterial growth by standard spectrophotometry**

3 Bacterial growth of MRSA 1, MRSA 2, MRSA 3 and MRSA 4 was monitored in parallel by  
4 optical density at 600 nm (OD<sub>600</sub>) using an Ultrospec 10 cell density meter (Amersham  
5 Biosciences). In brief, tubes containing prewarmed BHI alone or supplemented with 2 µg/mL  
6 of vancomycin were inoculated with 10<sup>7</sup> CFU (as in microcalorimetric studies) of either  
7 isolate, and incubated at 37°C. MRSA ATCC 43300, Mu3 and Mu50 were used as controls. All  
8 experiments were performed in duplicate.

9 **Supplementary Figure 1**

10 Spectrophotometric growth of selected *S. aureus* strains in BHI with or without 2 µg/mL of  
 11 vancomycin over 24 h (panel A) or in the first 8 h (panel B).

12 **(A)**

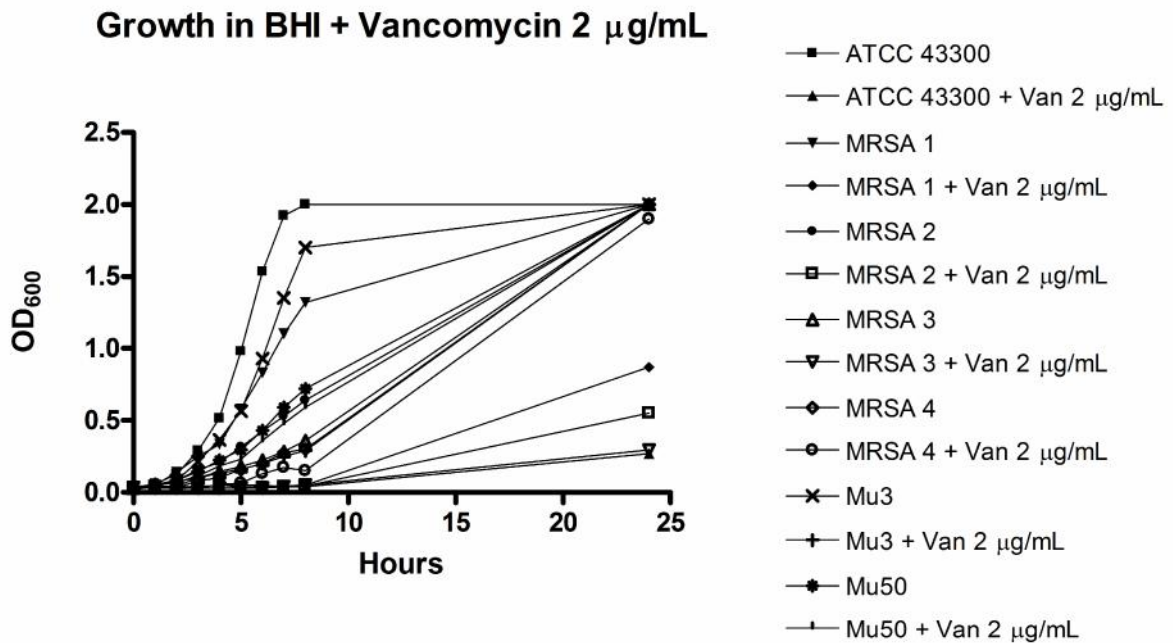

13

14 **(B)**

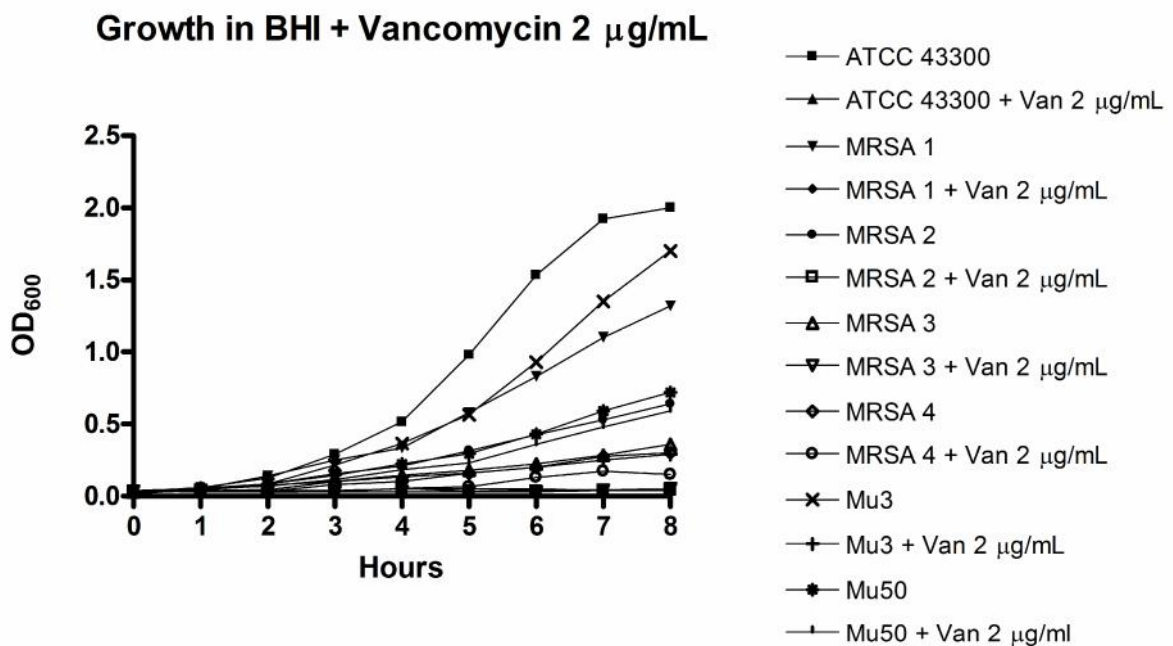

15

16 **Supplementary Figure 2**

17 Typical cumulative heat curves for the seven tested *S. aureus* reference strains in the  
18 presence of increasing concentrations of vancomycin (0 to 8, 12 and 16  $\mu\text{g}/\text{mL}$ ) recorded for  
19 up to 72 h of incubation.

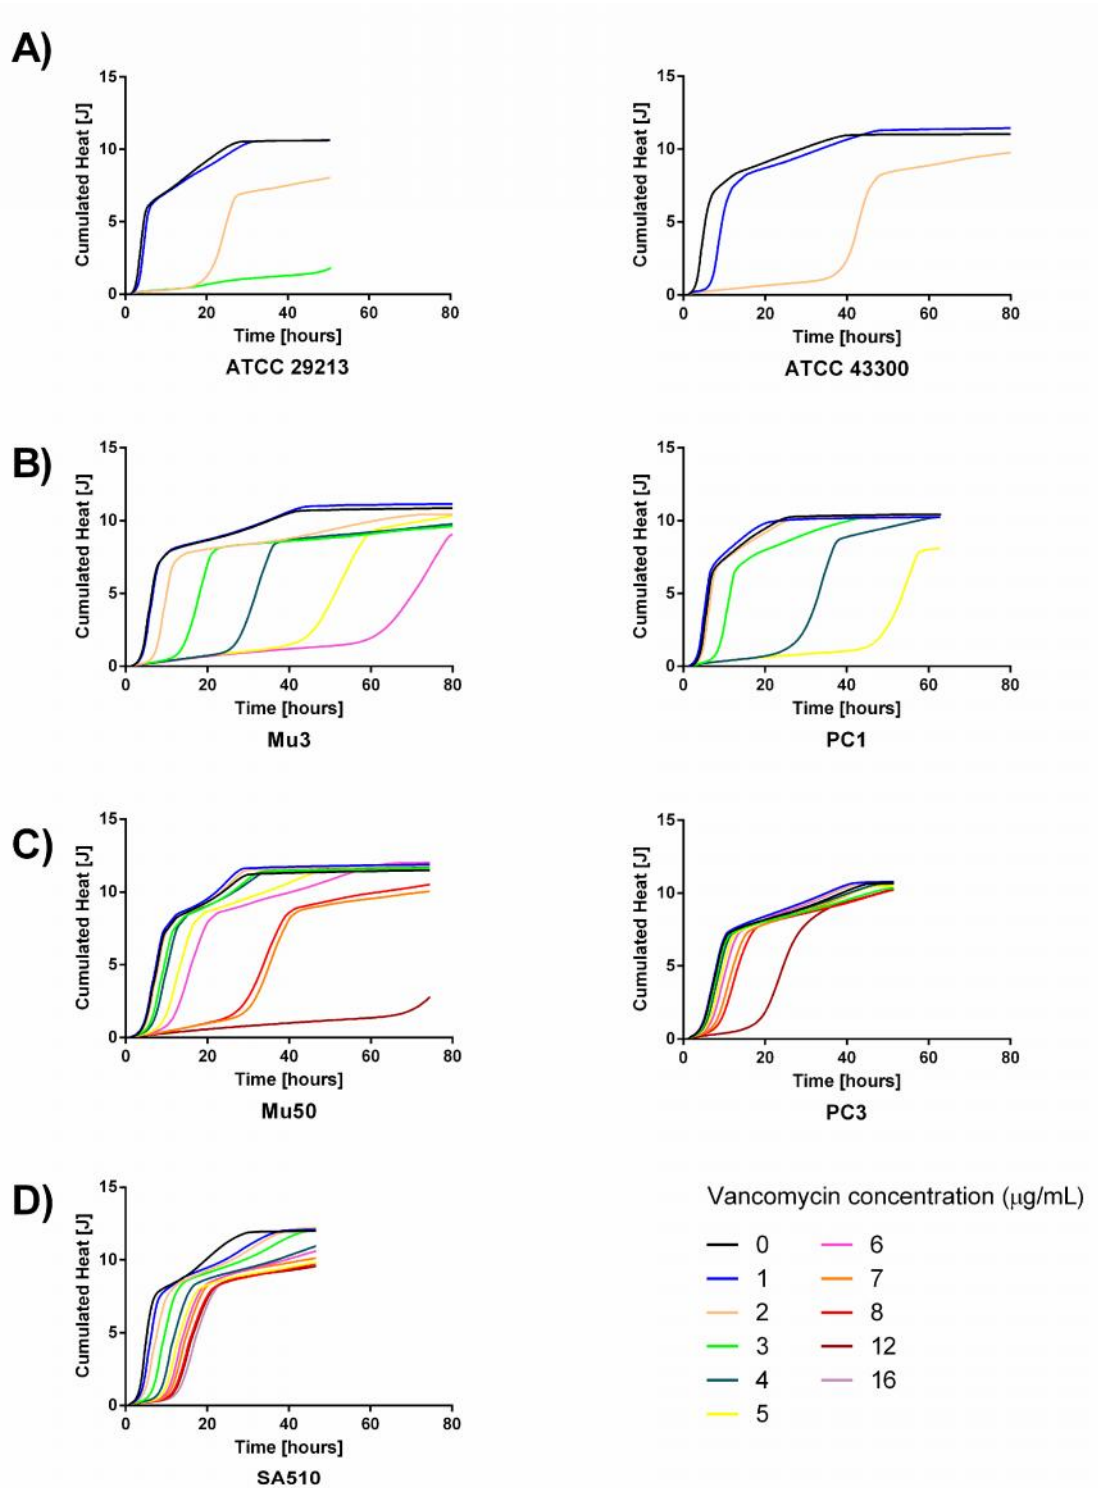

21 **Supplementary Table 1**

22 Mean time to detection (in hours) of bacterial growth for the additional clinical strains (VSSA = 20, hVISA = 4, VISA = 5) used in this study in the  
 23 presence of increasing concentrations of vancomycin (0, 2 and 4 µg/mL).

| Vancomycin phenotype by PAP | Strain | Mean time to detection of heat production |      |      |
|-----------------------------|--------|-------------------------------------------|------|------|
|                             |        | Vancomycin concentration (µg/mL)          |      |      |
|                             |        | 0                                         | 2    | 4    |
| VSSA                        | LY 1   | <1                                        | 29.1 | 47.0 |
| VSSA                        | LY 2   | <1                                        | 22.2 | 35.5 |
| VSSA                        | LY 3   | <1                                        | 10.3 | 25.0 |
| VSSA                        | LY 4   | <1                                        | 8.4  | 26.4 |
| VSSA                        | LY 8   | 1.8                                       | 6.2  | 36   |
| VSSA                        | LY 9   | 1.5                                       | 8.4  | 35.5 |
| VSSA                        | LY 11  | <1                                        | 30.9 | 45.0 |
| VSSA                        | LY 12  | <1                                        | 8.6  | 47.0 |
| VSSA                        | LY 13  | <1                                        | 16.0 | 36.0 |

|       |       |     |      |      |
|-------|-------|-----|------|------|
| VSSA  | LY 14 | <1  | 28.4 | >48  |
| VSSA  | LY 15 | <1  | 9.7  | 33.2 |
| VSSA  | LY 16 | <1  | 21.8 | 47.0 |
| VSSA  | LY 17 | <1  | 18.7 | 35.5 |
| VSSA  | LY 18 | <1  | 30.9 | 47.0 |
| VSSA  | LY 19 | <1  | 22.8 | 46.5 |
| VSSA  | LY 20 | <1  | 18.6 | 36.5 |
| VSSA  | BE 1  | <1  | 11.8 | >48  |
| VSSA  | BE 2  | <1  | 16.7 | 26.3 |
| VSSA  | DE 1  | <1  | 9.5  | 47.2 |
| VSSA  | DE 2  | <1  | 15.7 | 29.4 |
| hVISA | LY 5  | 2.8 | 3.4  | 13.2 |
| hVISA | LY 6  | <1  | 3.0  | 11.3 |
| hVISA | LY 7  | 1.8 | 4.4  | 18.2 |
| hVISA | LY 10 | <1  | 2.7  | 13.1 |
| VISA  | JO 1  | <1  | 4.1  | 7.7  |

|      |      |    |     |     |
|------|------|----|-----|-----|
| VISA | JO 2 | <1 | 4.3 | 7.8 |
| VISA | JO 3 | <1 | 3.8 | 4.9 |
| VISA | JO 4 | <1 | 4.0 | 5.4 |
| VISA | JO 5 | <1 | 4.0 | 6.3 |

---
